# Supplementary material for: Observations of sea ice melt from Operation IceBridge imagery
Source: Copernicus journal article supplement (doi:10.5194/tc-14-3523-2020), 2020-10-26
Supplement: Supplementary file 1 [file tc-14-3523-2020-supplement.pdf]

Supplement of The Cryosphere, 14, 3523–3536, 2020  
<https://doi.org/10.5194/tc-14-3523-2020-supplement>  
© Author(s) 2020. This work is distributed under  
the Creative Commons Attribution 4.0 License.

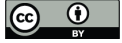

*Supplement of*

## **Observations of sea ice melt from Operation IceBridge imagery**

**Nicholas C. Wright et al.**

*Correspondence to:* Nicholas C. Wright ([ncwright.th@dartmouth.edu](mailto:ncwright.th@dartmouth.edu))

The copyright of individual parts of the supplement might differ from the CC BY 4.0 License.

Supplemental Figures:

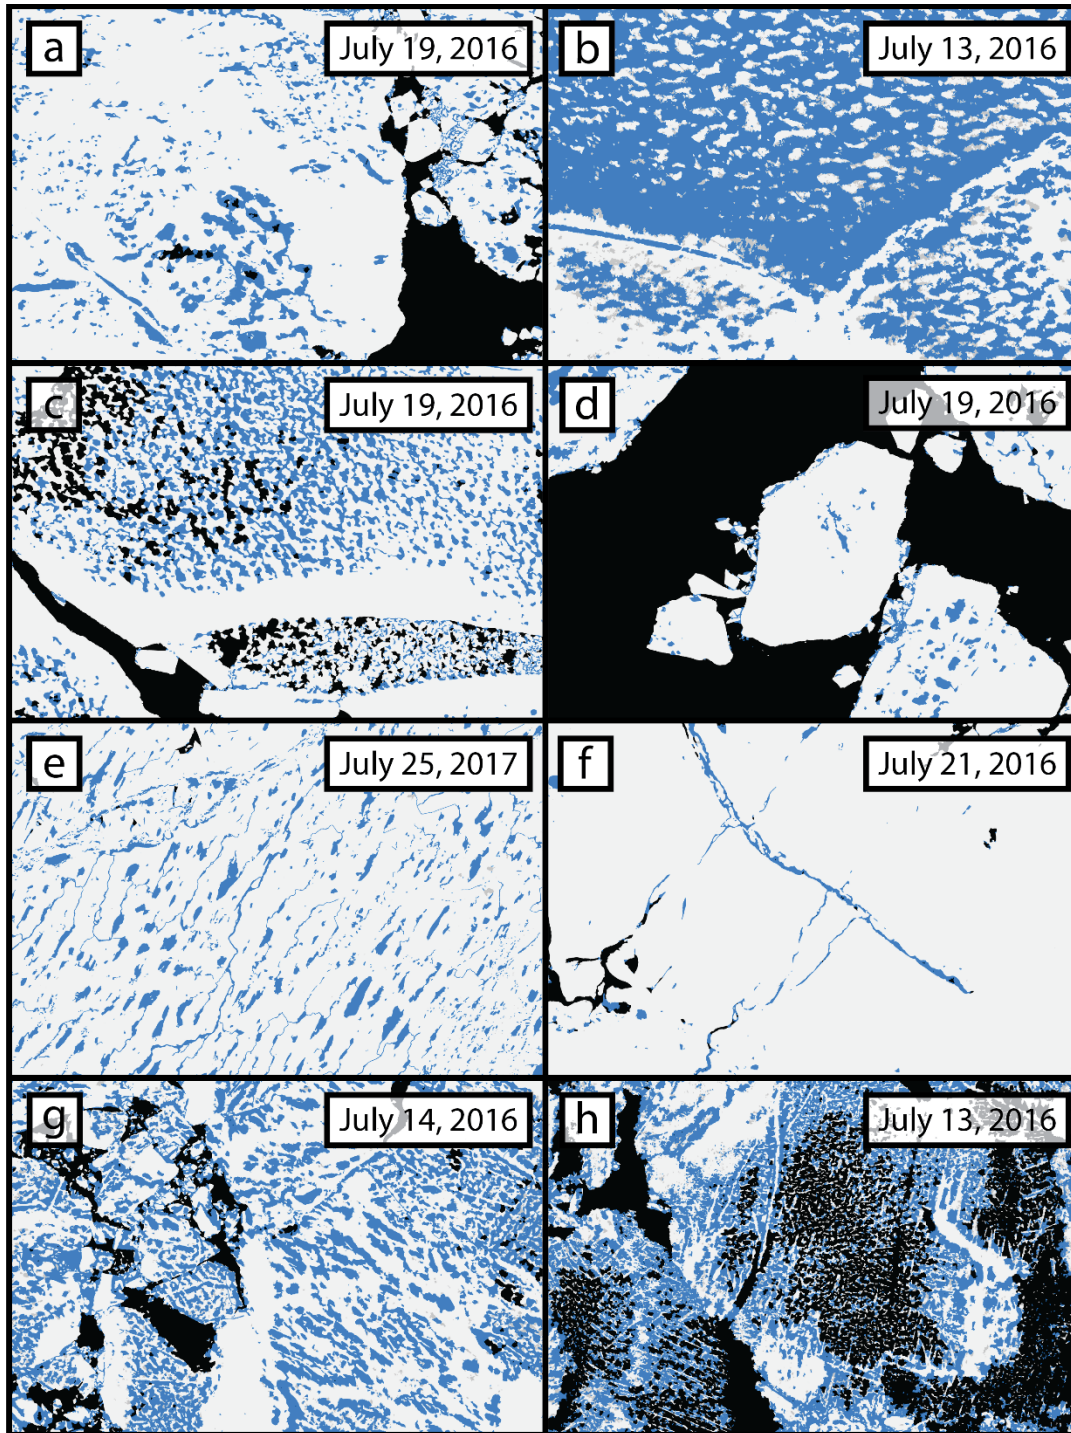

Figure S1. Classified versions of the images shown in Figure 10. White regions are snow/ice, blue regions are melt ponds or submerged ice, and black regions are open water.

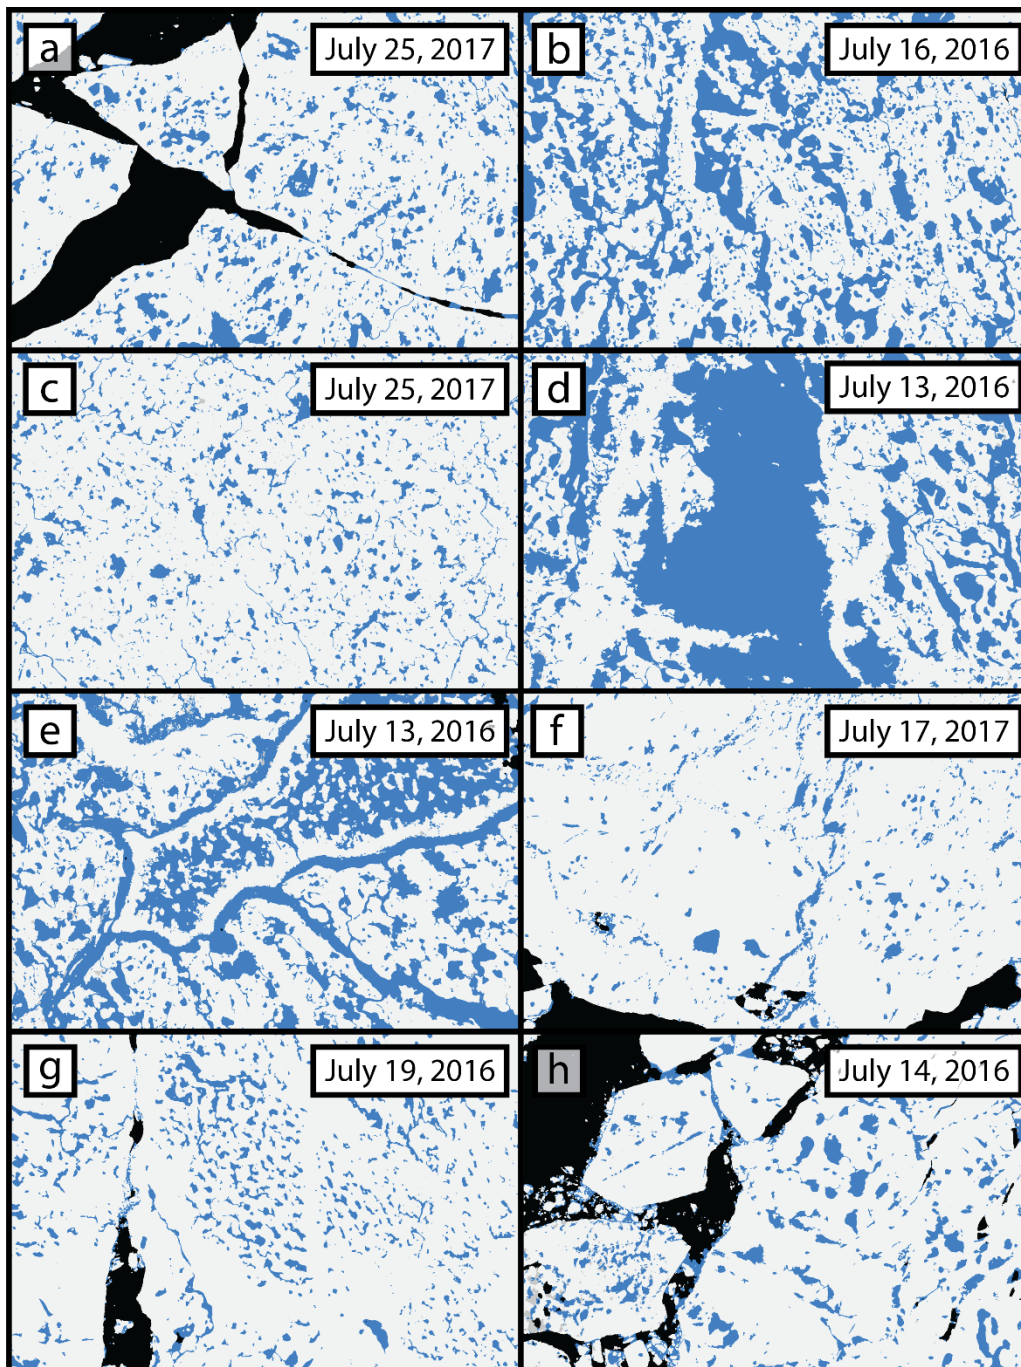

Figure S2. Classified versions of the images shown in Figure 11. White regions are snow/ice, blue regions are melt ponds or submerged ice, black regions are open water.
